# Supplementary material
Source: Springer Nature journal article supplement (https://www.springermedizin.de/resource/supplementary/12888_2005_154_MOESM1_ESM.pdf/9482016)

a.

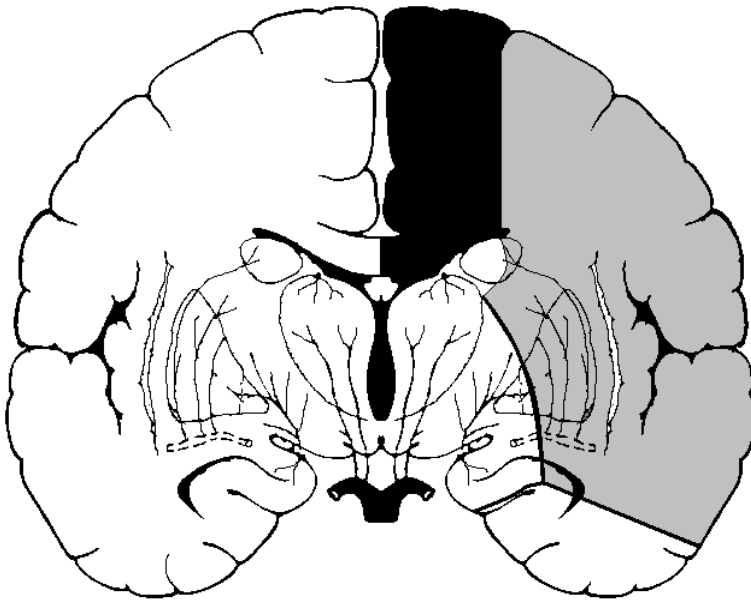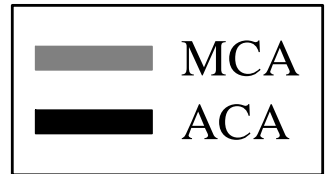

b.

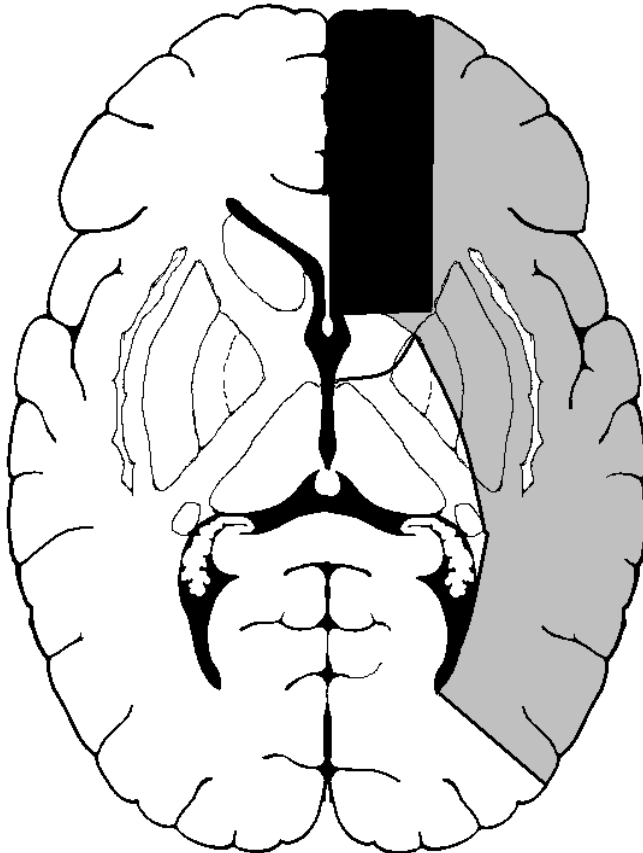

Supplement: MOESM1 [file 9482016]
